# Supplementary material for: Cystic fibrosis testing in a referral laboratory: results and lessons from a six-year period
Source: PubMed Central journal article supplement (PMC3563502; doi:10.1186/2043-9113-3-3), 2013-01-23
Supplement: 2043-9113-3-3-S1.pdf [file 2043-9113-3-3-S1.pdf]

**Additional File 1. Novel variants.**

| <b>Variant</b> | <b>Type/Protein Change</b> | <b>Classification</b>  |
|----------------|----------------------------|------------------------|
| c.-24A>G       | Promoter                   | Suspected Benign       |
| c.53+2T>C      | Splice/Intronic            | Mutation               |
| c.53+21G>A*    | Intronic                   | Benign                 |
| c.54-8T>A*     | Intronic                   | Benign                 |
| c.273+35C>T    | Intronic                   | Benign                 |
| c.441C>G       | p.His147Gln                | VUS                    |
| c.579+40A>G    | Intronic                   | Benign                 |
| c.1210G>C      | p.Gly404Arg/Splice?        | VUS                    |
| c.1301C>A      | p.Ser434X                  | Severe Pathogenic      |
| c.1400T>C†     | p.Leu467Pro                | Severe Pathogenic      |
| c.1486T>G      | p.Trp496Gly                | VUS                    |
| c.1679+9C>G    | Intronic                   | Suspected Benign       |
| c.1742T>A      | p.Leu581X                  | VUS                    |
| c.2708A>G      | p.Tyr903Cys                | VUS                    |
| c.2909-6T>C    | Intronic                   | Benign                 |
| c.2988+40T>A   | Intronic                   | Suspected Benign       |
| c.3080T>G      | p.Ile1027Ser               | Benign                 |
| c.3718G>T†     | p.Val1240Leu/Splice?       | VUS                    |
| c.3723C>A      | p.Gly1241Gly               | Benign                 |
| c.3849G>C      | p.Arg1283Ser               | At least mild mutation |
| c.4243-20A>G*  | Intronic                   | Benign                 |

| <b>Computer Prediction</b>                                 | <b>Ethnicity</b>           | <b>Age at Testing</b> |
|------------------------------------------------------------|----------------------------|-----------------------|
| N/A                                                        | Hispanic                   | Unknown               |
| Predicted to change splicing                               | African-American           | Unknown               |
| No predicted splicing changes                              | Asian/Oriental             | 48                    |
| No predicted splicing changes                              | Caucasian                  | 47                    |
| No predicted splicing changes                              | Caucasian                  | Unknown               |
| Tolerated, Possibly Damaging                               | Caucasian                  | 6                     |
| No predicted splicing changes                              | Caucasian                  | Unknown               |
| Deleterious, Benign, No predicted splicing changes         | African-American/Caucasian | 11                    |
| N/A                                                        | African-American           | Unknown               |
| Deleterious, Probably Damaging                             | Caucasian                  | 5                     |
| Tolerated, Probably Damaging                               | Caucasian                  | 17                    |
| No predicted splicing changes                              | Hispanic                   | 6                     |
| N/A                                                        | Caucasian                  | 1                     |
| Tolerated, Benign                                          | Caucasian                  | 44                    |
| No predicted splicing changes                              | Middle Eastern             | 9                     |
| No predicted splicing changes                              | African-American           | <1                    |
| Deleterious, Benign                                        | Caucasian                  | 1                     |
| Tolerated, Possibly Damaging, Predicted to change splicing | Caucasian                  | 56                    |
| N/A                                                        | Caucasian                  | 1                     |
| Deleterious, Probably Damaging                             | African-American           | 25                    |
| No predicted splicing changes                              | African-American           | <1                    |

---

**Other Known Deleterious Mutations**

---

None

None

None

None

None

None

None

None

c.1585-1G>A

c.1521\_1523del (p.Phe508del)

c.3909C>G (p.Asn1303Lys)

None

None

None

5T-12TG

c.350G>A (p.Arg117His)

None

c.1001G>T (p.R334L)

None

c.3197G>A (p.Arg1066His)

c.224G>T (p.Arg75Leu), c.2988+1G>A

---

---

## Clinical Symptoms

---

Chronic cough, pseudomonas, staph pneumonia, and pancreatic insufficiency

Failure to thrive, malabsorption due to pancreatic insufficiency

Pancreatitis

Pancreatitis, sinusitis, asthma

Unknown

Recent weight loss, NF1 diagnosis, ADHD, delays, chronic ear infections

Pancreatitis

Sinusitis

Failure to thrive, chronic cough

Pneumonia, chronic cough, height is 25% and weight is 10%

Pneumonia, chronic cough, lung disease

Sinusitis, asthma

Sinusitis

No symptoms (spouse of known CF carrier)

Pneumonia, chronic cough, bronchiectasis, sinusitis

Elevated IRT

Rectal prolapse

Chronic cough, sinusitis

Jaundiced, elevated liver enzymes, FTT

Failure to thrive, chronic cough, bronchiectasis, sinusitis, asthma, sinus surgeries revealed necrosis and inflammation

Abnormal newborn screen

---

| Sweat Chloride Test |
|---------------------|
| 65 (High)           |
| Unknown             |
| Unknown             |
| Unknown             |
| Normal              |
| 49 (Borderline), 46 |
| None                |
| 54 (Borderline), 62 |
| High                |
| 97 (High)           |
| 59 (Borderline)     |
| Borderline          |
| None                |
| Unknown             |
| Normal              |
| Unknown             |
| Unknown             |
| Unknown             |
| Unknown             |
| 85 (High)           |
| Unknown             |

Additional File 1: Novel variants (SNVs not found in any of the three databases) are shown along with the protein change/type of change, classification, in silico functional prediction, ethnicity, age at testing, the results of deletion and duplication (Del/Dup) testing, other known pathogenic mutations, clinical symptoms, results from sweat chloride tests (if performed), and family history of CF. Sweat chloride values consistently above 60 mmol/L are indicative of classic CF, while borderline values (40-59 mmol/L) may reflect some CF-like symptoms, but without a diagnosis of CF. Variants were assigned to one (or more) of six classes. Promoter variants are variants upstream of the translational start site, and a splice site variant is a variant located in one of the four positions flanking exon/intron (and intron/exon) boundaries. If an individual reported belonging to multiple ethnic groups, each of the groups is listed, separated by a forward slash. Predictions were made using SIFT, Polyphen-2, and a composite prediction from Alamut (Interactive Biosoftware, 2012). SIFT returned deleterious or tolerated (Kumar, *et al.*, 2009), Polyphen-2 returned benign, possibly damaging, or probably damaging (Adzhubei, *et al.*, 2010), and Alamut showed a graphic displaying whether or not there were predicted splicing changes.

\*Indicates Deletion/Duplication analysis was performed and was negative, otherwise it was not performed

†Indicates a family history of CF with the p.Leu467Pro mutation also seen in an affected relative.
